# Supplementary material for: Neuroinflammation in Bipolar Depression
Source: PubMed Central journal article supplement (PMC7054443; doi:10.3389/fpsyt.2020.00071), 2020-02-26
Supplement: Image_1.pdf [file Image_1.pdf]

| IL-6 | TNF- $\alpha$ | sTNFR1 | sTNFR2 | CRP | IL-2 | INF- $\gamma$ | IL-10 | IL-4 | CCL11 | CCL24 | CXCL10 | CXCL8 | REF  |
|------|---------------|--------|--------|-----|------|---------------|-------|------|-------|-------|--------|-------|------|
| ↑    |               |        |        |     |      |               |       |      |       |       |        |       | [21] |
| ↑    |               |        |        |     |      |               |       |      |       |       |        |       | [22] |
|      | ↑             |        |        |     |      |               |       |      |       |       |        |       | [19] |
|      | ↑             |        |        |     |      |               |       |      |       |       |        |       | [22] |
|      | ↑             |        |        |     |      |               |       |      |       |       |        |       | [24] |
|      | =             |        |        |     |      |               |       |      |       |       |        |       | [25] |
|      | =             |        |        |     |      |               |       |      |       |       |        |       | [26] |
|      |               | ↑      |        |     |      |               |       |      |       |       |        |       | [27] |
|      |               |        | =      |     |      |               |       |      |       |       |        |       | [27] |
|      |               |        |        | ↑   |      |               |       |      |       |       |        |       | [28] |
|      |               |        |        | ↑   |      |               |       |      |       |       |        |       | [29] |
|      |               |        |        | ↑   |      |               |       |      |       |       |        |       | [30] |
|      |               |        |        | =   |      |               |       |      |       |       |        |       | [31] |
|      |               |        |        |     | =    |               |       |      |       |       |        |       | [21] |
|      |               |        |        |     | =    |               |       |      |       |       |        |       | [32] |
|      |               |        |        |     |      | ↓             |       |      |       |       |        |       | [33] |
|      |               |        |        |     |      | ↑             |       |      |       |       |        |       | [34] |
|      |               |        |        |     |      |               | =     |      |       |       |        |       | [21] |
|      |               |        |        |     |      |               | =     |      |       |       |        |       | [32] |
|      |               |        |        |     |      |               |       | ↑    |       |       |        |       | [22] |
|      |               |        |        |     |      |               |       |      | ↑     |       |        |       | [37] |
|      |               |        |        |     |      |               |       |      |       | ↑     |        |       | [37] |
|      |               |        |        |     |      |               |       |      |       |       | ↑      |       | [37] |
|      |               |        |        |     |      |               |       |      |       |       |        | ↓     | [37] |

**Supplementary Figure 1.** Key cytokines and chemokines alterations in BD patients compared with healthy controls. ↑ - increased ↓ - decreased = - no significant difference found. REF column is for reference to papers in which those specific cytokines were examined.
